# Supplementary material for: Understanding Selenium and Glutathione as Antiviral Factors in COVID-19: Does the Viral Mpro Protease Target Host Selenoproteins and Glutathione Synthesis?
Source: PubMed Central journal article supplement (PMC7492384; doi:10.3389/fnut.2020.00143), 2020-09-02
Supplement: Data_Sheet_1.pdf [file Data_Sheet_1.pdf]

## *Supplementary Materials*

*for*

Taylor & Radding, 2020

| <b>M<sup>pro</sup> site</b> | <b>2003 SARS-CoV</b> | <b>2019 SARS-CoV-2</b> | <b># Non-identical</b> |
|-----------------------------|----------------------|------------------------|------------------------|
| nsp4/5                      | SAVLQ/SGFRK          | SAVLQ/SGFRK            | 0                      |
| nsp5/6                      | GVTFQ/GKFKK          | GVTFQ/SAVKR            | 4                      |
| nsp6/7                      | VATVQ/SKMSD          | VATVQ/SKMSD            | 0                      |
| nsp7/8                      | RATLQ/AIASE          | RATLQ/AIASE            | 0                      |
| nsp8/9                      | AVKLQ/NNELS          | AVKLQ/NNELS            | 0                      |
| nsp9/10                     | TVRLQ/AGNAT          | TVRLQ/AGNAT            | 0                      |
| nsp10/11                    | EPLMQ/SADAS          | EPMLQ/SADAQ            | 3                      |
| nsp12/13                    | HTVLQ/AVGAC          | HTVLQ/AVGAC            | 0                      |
| nsp13/14                    | VATLQ/AENVT          | VATLQ/AENVT            | 0                      |
| nsp14/15                    | FTRLQ/SLENV          | FTRLQ/SLENV            | 0                      |
| nsp15/16                    | YPKLQ/ASQAW          | YPKLQ/SSQAW            | 1                      |

**Figure S1.** The 11 known M<sup>pro</sup> cleavage sites in the 2003 and 2019 SARS coronaviruses with a comparison of the 10-residue protein sequences spanning the cleavages sites in the two viruses. The alignments underneath each of the virus names (2003 SARS-CoV and 2019 SARS-CoV-2) were used to generate the logos shown in Fig. 1A and 1B. The cleavage sites and sequences for the SARS-CoV (Genbank NC\_004718.3) are given in reference (10), and the equivalent sequences in SARS-CoV-2 were taken from its Genbank Reference Sequence, NC\_045512.

## S.2 Web server protease cleavage site prediction results cited in Figure 2.

Genbank source files for the protein sequences: **GCLC**: NP\_001309424.1; **SELENOP**: NP\_005401.3; **GLRX1**: NP\_001112362.1; **TXNRD1**: NP\_877393.1 **SELENOF**: NP\_004252.2; **GPX1**: NP\_000572.2

### S.2.1. NetCorona results from cbs.dtu.dk/services/NetCorona

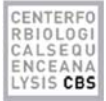

#### NetCorona 1.0 Server - prediction results Technical University of Denmark

---

165 SelenoF  
 MVAMAAGPSGCLVPAFGLRLLL**ATVLQAVSAF**GAEFSSSEACRELGFSSNLLCSSCDLLGQFNLLQLDPPDCRGCCQEAAQF 80  
 ETKKLYAGAILEVCGCKLGRFPQVQAFVRSDDPKLFRGLQIKYVRGSDPVLKLLDDNGNIAEELSILKWNTDSVEEFLSE 160  
 KLERI Selenocysteine (U) at #96 changed to C for search as NetCorona ignores U  
 .....C..... 80  
 ..... 160  
 .....

| Pos | Score | Cleavage                              |
|-----|-------|---------------------------------------|
| 27  | 0.846 | <b>ATVLQ<sup>^</sup>AVSAF</b> SelenoF |
| 60  | 0.067 | none SelenoF                          |
| 65  | 0.073 | none SelenoF                          |
| 75  | 0.066 | none SelenoF                          |
| 79  | 0.064 | none SelenoF                          |
| 103 | 0.064 | none SelenoF                          |
| 105 | 0.219 | none SelenoF                          |
| 120 | 0.136 | none SelenoF                          |

---

499 TXNRD1  
 MNGPEDLPKSYDYDLIIIGGGSGGLAAAKEAAQYGKKVMVLDVFTPTPLGTRWGLGGTCVNVGCI PKKLMHQAALLGQAL 80  
 QDSRNYGWKVEETVKHDWDRMIEAVQNHIHISLNWGYRVALREKKVYENAYGQFIGPHRIKATNNGKEKIYSAERFLIA 160  
 TGERPRYLGI PGDKEYCISDDDLFSLPYCPGKTLVVGASYVALEACAGFLAGIGLDVTVMVRSILLRGFDQDMANKIGEHEM 240  
 EEHGIFIRQFVPIKVEQIEAGTPGRLRVVAQSTNSEEIEGEYNTVMLAIGRDACRTRKIGLETGVGKINEKTGKIPVTD 320  
 EEQTNVPYIYAIGDILEDKVELTPVAIQAGRLLAQRLYAGSTVKCDYENVPTTVFTPLEYGACGLSEEKAVEKFGEENIE 400  
 VYHSYFWPLEWTIPSRDNNKCYAKII CNTKDNERVVG FHVLPNAGEVTQGF AAALKCGLTKKQLDSTIGIHPVCAEVFT 480  
 TLSVTKRSG**ASILQAGCCG** (Penultimate U changed to C as NetCorona ignores U)  
 ..... 80  
 ..... 160  
 ..... 240  
 .....C..... 320  
 ..... 400  
 ..... 480  
 .....C.....

| Pos | Score | Cleavage                             |
|-----|-------|--------------------------------------|
| 33  | 0.068 | none TXNRD1                          |
| 72  | 0.104 | none TXNRD1                          |
| 78  | 0.071 | none TXNRD1                          |
| 81  | 0.123 | none TXNRD1                          |
| 106 | 0.073 | none TXNRD1                          |
| 133 | 0.071 | none TXNRD1                          |
| 230 | 0.075 | none TXNRD1                          |
| 250 | 0.070 | none TXNRD1                          |
| 258 | 0.065 | none TXNRD1                          |
| 272 | 0.505 | <b>RVVAQ<sup>^</sup>STNSE</b> TXNRD1 |
| 323 | 0.061 | none TXNRD1                          |
| 348 | 0.191 | none TXNRD1                          |
| 355 | 0.064 | none TXNRD1                          |
| 450 | 0.107 | none TXNRD1                          |
| 464 | 0.074 | none TXNRD1                          |
| 494 | 0.640 | <b>ASILQ<sup>^</sup>AGCCG</b> TXNRD1 |

## S.2.2. PROSPER, the Protease Specificity Prediction Server, results from prosper.erc.monash.edu.au

### S.2.2.B.

B. **GCLC-a** VTFQ/A PROSPER (1.00)  
**nsp5/6\*** VTFQ/G

#### Predicted cleavage sites of individual proteases

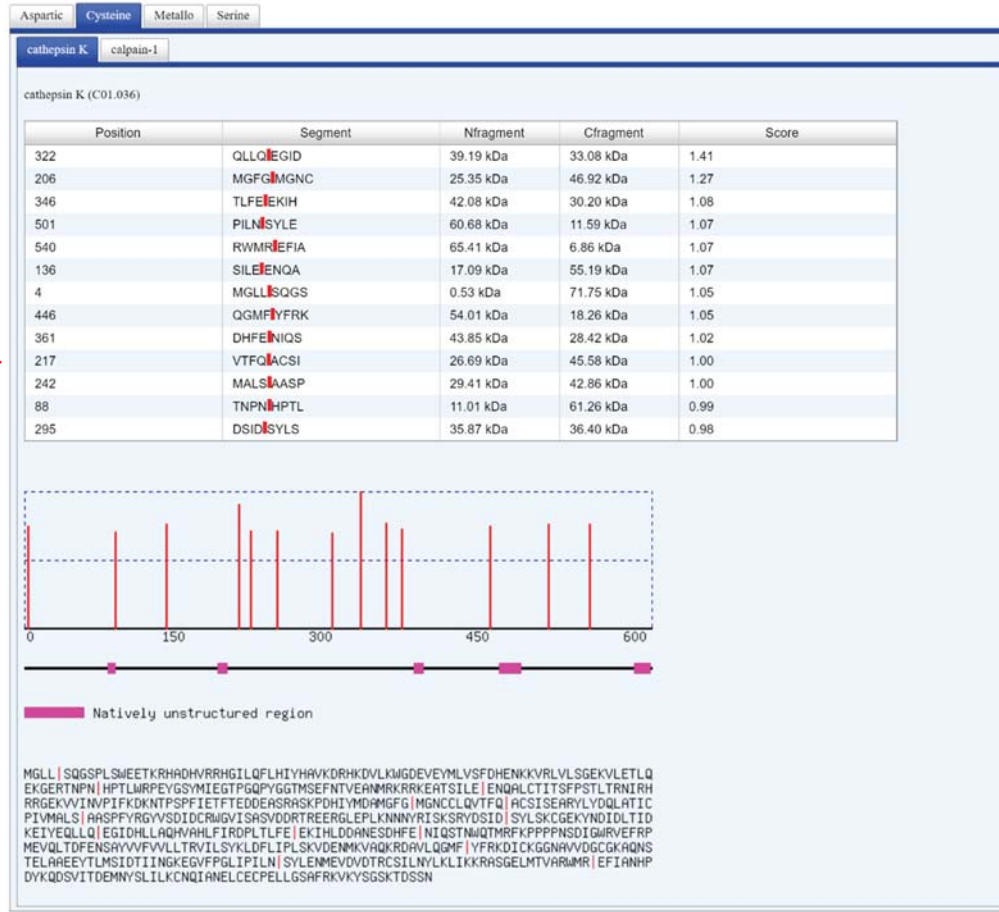

### S.2.2.D.

D. **GLRX-1** VSLQ/Q PROSPER (1.30)  
**nsp8/9** VKLQ/N

#### Predicted cleavage sites of individual proteases

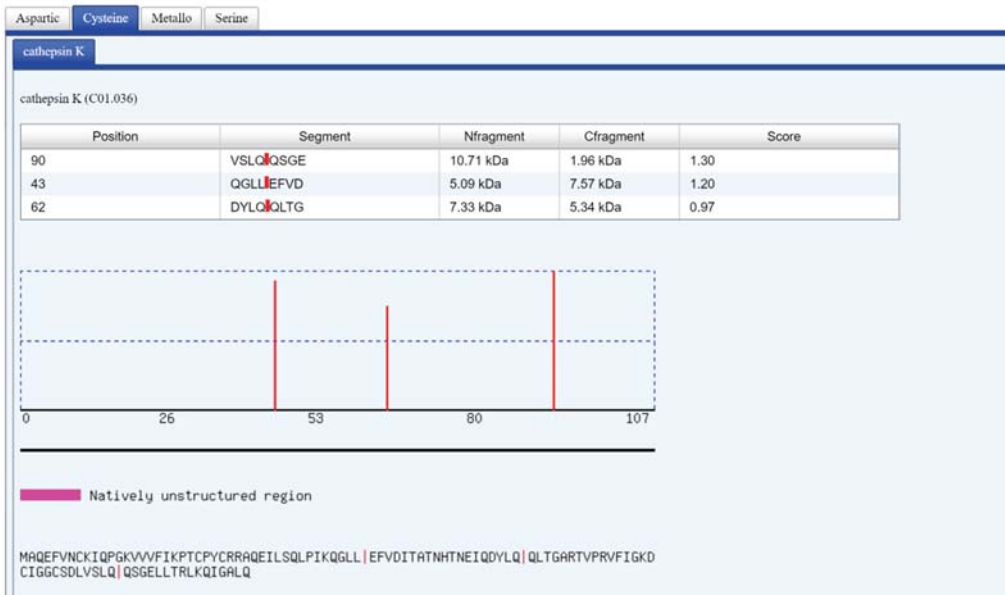

S.2.2.E.

E. **TXNRD1** **SILQ/A** PROSPER (1.14)

**nsp12/13** **TVLQ/A**

Predicted cleavage sites of individual proteases

Aspartic Cysteine Metallo Serine

cathepsin K calpain-1

cathepsin K (C01.036)

| Position | Segment            | Nfragment | Cfragment | Score |
|----------|--------------------|-----------|-----------|-------|
| 494      | SILQ <b>A</b> GCU  | 60.06 kDa | 0.52 kDa  | 1.14  |
| 406      | HSYF <b>I</b> WPLE | 49.71 kDa | 10.86 kDa | 1.14  |
| 121      | VALR <b>E</b> EKKV | 15.05 kDa | 45.52 kDa | 1.14  |
| 184      | DDLF <b>S</b> LPY  | 22.95 kDa | 37.62 kDa | 1.12  |
| 185      | DLFS <b>L</b> PYC  | 23.04 kDa | 37.53 kDa | 1.12  |
| 453      | QGFA <b>A</b> AALK | 55.44 kDa | 5.13 kDa  | 1.12  |
| 386      | CGLS <b>E</b> EKA  | 47.17 kDa | 13.41 kDa | 1.08  |
| 348      | VAIQ <b>A</b> GRRL | 42.66 kDa | 17.92 kDa | 1.07  |
| 358      | QRLY <b>A</b> GST  | 43.92 kDa | 16.66 kDa | 0.98  |
| 44       | LDFV <b>T</b> PTP  | 5.39 kDa  | 55.18 kDa | 0.95  |
| 179      | YCIS <b>S</b> DDL  | 22.38 kDa | 38.20 kDa | 0.95  |
| 310      | VKIN <b>E</b> KTG  | 38.22 kDa | 22.36 kDa | 0.94  |

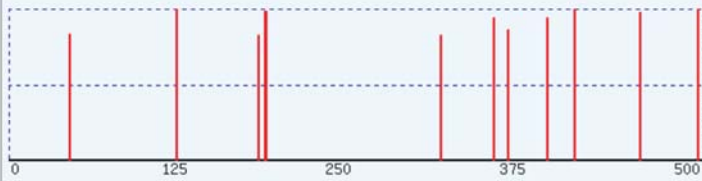

Natively unstructured region

MNGPEDLPKSYDYDLIIIGGGSGGLAARKEAAQYKVMVLDVF|TPTPLGTRWGLGGTCVNVGCIKMLMHQAALLGQA  
 LQDSRNYGAIKVEETVKHDWRMIERVQNHIGSLNMGYRVALR|EKKVYYENAYGQFIGPHRIKATNNKGKEKIYSARFL  
 IATGERPRYLGI PGDKKEYCIS|SDDL|S|LPYCPGKTLVVGASVVALECAAGFLAGIGLDVTVMVRISILLRGFDQDMANK  
 IGEHMEEHGKIFIRQFVPIKVEQIEAGTPGRLLRVVAQSTNSEEIEEGEYNTVMLAIGRDACTRKIGLETGVGKIN|EKTG  
 KIPVTDEEQTNVPIYVAIGDILEDKVELTPVAIQ|AGRLLAQRLY|AGSTVCKDVENVPTTVFTPLEYGACGLS|EEKAV  
 EKFGEEINIEVYHSYF|WPLEWTIPSRDNNKCYAKIICNTKDNERVVGPHVLGPNAGEVTQGF|AALCKGLTKKQLDSTI  
 GIHPVCAEVFTTLLSVTKRSGASILQ|AGCUG

S.2.2.F.

F. **SelenoF** **TVLQ/A** PROSPER (1.02)

**nsp12/13** **TVLQ/A**

Predicted cleavage sites of individual proteases

Aspartic Cysteine Metallo Serine

cathepsin K

cathepsin K (C01.036)

| Position | Segment            | Nfragment | Cfragment | Score |
|----------|--------------------|-----------|-----------|-------|
| 47       | LGFS <b>S</b> NLL  | 5.30 kDa  | 14.11 kDa | 1.15  |
| 155      | DSVE <b>E</b> FLS  | 18.17 kDa | 1.24 kDa  | 1.13  |
| 33       | SAFG <b>A</b> EFS  | 3.67 kDa  | 15.74 kDa | 1.04  |
| 27       | TVLQ <b>A</b> VSA  | 3.02 kDa  | 16.39 kDa | 1.02  |
| 30       | QAV <b>S</b> AFGA  | 3.28 kDa  | 16.13 kDa | 1.02  |
| 59       | DLLG <b>I</b> QFNL | 6.62 kDa  | 12.79 kDa | 0.99  |

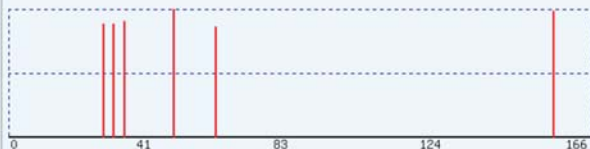

Natively unstructured region

MVMAHAGSGGLVPAFGLRLLLATVLQ|AVS|AFG|AFESSEACRELGFS|SNLLCSSCDLLG|QFNLLQLDPCRCGCCQ  
 EEHQFETKLYAGAILVCGUKLGRFPVQAFVRSKPKLFRGLQIKYVRGSDPVLKLLDONGNI REELSILKWNDSVE  
 |EFLSEKLERI

### S.2.3. Procleave results from procleave.erc.monash.edu.au

#### S.2.3.A.

A. GCLC-b AVLQ/G  
nsp4/5 AVLQ/S

ProCleave #7/592 for Cathepsin S

#### PROTEASE

Cathepsin S (C01.034)

#### PREDICTED CLEAVAGE SITES

Copy PDF CSV Excel

Search:

| Rank | Position | P4-P4' Site | N-fragment | C-fragment | Score | Family  |
|------|----------|-------------|------------|------------|-------|---------|
| 1    | 583      | ELLG↑SAFR   | 70.32 kDa  | 1.95 kDa   | 0.923 | C01.034 |
| 2    | 576      | NELC↑ECPE   | 69.46 kDa  | 2.81 kDa   | 0.910 | C01.034 |
| 3    | 582      | PELL↑GSAF   | 70.14 kDa  | 2.13 kDa   | 0.832 | C01.034 |
| 4    | 5        | MGLL↑SQGS   | 0.53 kDa   | 71.75 kDa  | 0.803 | C01.034 |
| 5    | 243      | MALS↑AASP   | 29.41 kDa  | 42.86 kDa  | 0.793 | C01.034 |
| 6    | 57       | YMLV↑SFDH   | 7.10 kDa   | 65.17 kDa  | 0.676 | C01.034 |
| 7    | 444      | AVLQ↑GMFY   | 53.56 kDa  | 18.71 kDa  | 0.648 | C01.034 |

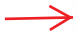

#### S.2.3.B.

B. GCLC-a VTFQ/A  
nsp5/6\* VTFQ/G

ProCleave #13 of 592 for Cathepsin L

#### PROTEASE

Cathepsin L (C01.032)

#### PREDICTED CLEAVAGE SITES

Copy PDF CSV Excel

Search:

| Rank | Position | P4-P4' Site | N-fragment | C-fragment | Score | Family  |
|------|----------|-------------|------------|------------|-------|---------|
| 1    | 243      | MALS↑AASP   | 29.41 kDa  | 42.86 kDa  | 0.993 | C01.032 |
| 2    | 583      | ELLG↑SAFR   | 70.32 kDa  | 1.95 kDa   | 0.973 | C01.032 |
| 3    | 5        | MGLL↑SQGS   | 0.53 kDa   | 71.75 kDa  | 0.945 | C01.032 |
| 4    | 6        | GLLS↑QGSP   | 0.61 kDa   | 71.66 kDa  | 0.878 | C01.032 |
| 5    | 544      | REFI↑ANHP   | 65.80 kDa  | 6.47 kDa   | 0.798 | C01.032 |
| 6    | 112      | QPYG↑GTMS   | 14.09 kDa  | 58.18 kDa  | 0.767 | C01.032 |
| 7    | 57       | YMLV↑SFDH   | 7.10 kDa   | 65.17 kDa  | 0.752 | C01.032 |
| 8    | 323      | QLLQ↑EGID   | 39.19 kDa  | 33.08 kDa  | 0.745 | C01.032 |
| 9    | 58       | MLVS↑FDHE   | 7.19 kDa   | 65.08 kDa  | 0.712 | C01.032 |
| 10   | 80       | ETLQ↑EKGE   | 9.87 kDa   | 62.40 kDa  | 0.691 | C01.032 |
| 11   | 330      | DHLL↑AQHV   | 40.09 kDa  | 32.18 kDa  | 0.675 | C01.032 |
| 12   | 233      | DQLA↑TICP   | 28.38 kDa  | 43.89 kDa  | 0.657 | C01.032 |
| 13   | 218      | VTFQ↑ACSI   | 26.69 kDa  | 45.58 kDa  | 0.655 | C01.032 |

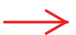

S.2.3.C.

C. SelenoP ALLQ/A  
nsp7/8 ATLQ/A  
PROTEASE

ProCleave #3/374 for Cathepsin L

Cathepsin L (C01.032)

PREDICTED CLEAVAGE SITES

Copy PDF CSV Excel

Search:

| Rank | Position | P4-P4' Site | N-fragment | C-fragment | Score | Family  |
|------|----------|-------------|------------|------------|-------|---------|
| 1    | 200      | KTVE↑TPSP   | 23.45 kDa  | 20.25 kDa  | 0.976 | C01.032 |
| 2    | 16       | CLLP↑SGGT   | 1.75 kDa   | 41.96 kDa  | 0.900 | C01.032 |
| → 3  | 57       | ALLQ↑ASUY   | 6.42 kDa   | 37.29 kDa  | 0.892 | C01.032 |

S.2.3.D.

D. GLRX-1 VSLQ/Q  
nsp8/9 VKLQ/N  
PROTEASE

ProCleave #1/99 for Cathepsin S

Cathepsin S (C01.034)

PREDICTED CLEAVAGE SITES

Copy PDF CSV Excel

Search:

| Rank | Position | P4-P4' Site | N-fragment | C-fragment | Score | Family  |
|------|----------|-------------|------------|------------|-------|---------|
| → 1  | 91       | VSLQ↑QSGE   | 10.71 kDa  | 1.96 kDa   | 0.878 | C01.034 |
| 2    | 66       | QQLT↑GART   | 7.67 kDa   | 5.00 kDa   | 0.771 | C01.034 |
| 3    | 63       | DYLQ↑QLTG   | 7.33 kDa   | 5.34 kDa   | 0.660 | C01.034 |
| 4    | 48       | EFVD↑ITAT   | 5.58 kDa   | 7.08 kDa   | 0.550 | C01.034 |
| 5    | 89       | DLVS↑LQQS   | 10.46 kDa  | 2.20 kDa   | 0.465 | C01.034 |

S.2.3.G.

G. GPX1 ASLU/G  
nsp13/14 ATLQ/A  
PROTEASE

ProCleave #2/196 for Cathepsin S

Cathepsin S (C01.034)

PREDICTED CLEAVAGE SITES

Copy PDF CSV Excel

Search:

| Rank | Position | P4-P4' Site | N-fragment | C-fragment | Score | Family  |
|------|----------|-------------|------------|------------|-------|---------|
| 1    | 170      | KFLV↑GPDG   | 19.79 kDa  | 4.08 kDa   | 0.895 | C01.034 |
| → 2  | 50       | ASLU↑GTTV   | 5.18 kDa   | 18.69 kDa  | 0.770 | C01.034 |
| 3    | 26       | RPLA↑GGEP   | 2.43 kDa   | 21.44 kDa  | 0.759 | C01.034 |

**Figure S3. Mapping of predicted M<sup>Pro</sup> cleavage sites to accessible surface regions of the target proteins**

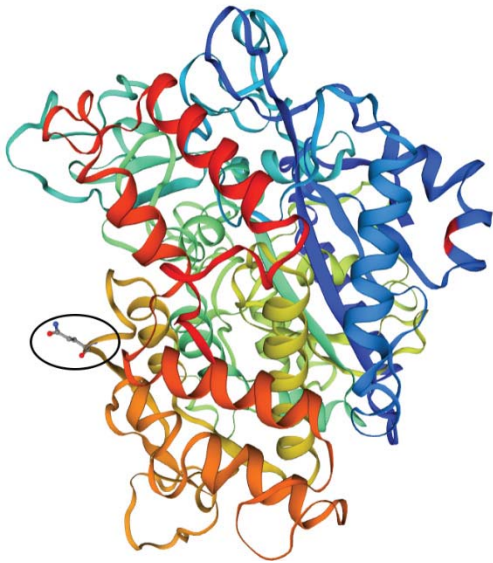

**Fig. S3-A.** Homology model of GCLC showing location of site GCLC-b, AVLQ/G (circled). The Gln in P1 is shown. The GCLC homology model used in lieu of an X-ray structure is based on the yeast enzyme PDB file 3ig5.1 and is found here: [swissmodel.expasy.org/repository/uniprot/P48506](http://swissmodel.expasy.org/repository/uniprot/P48506)

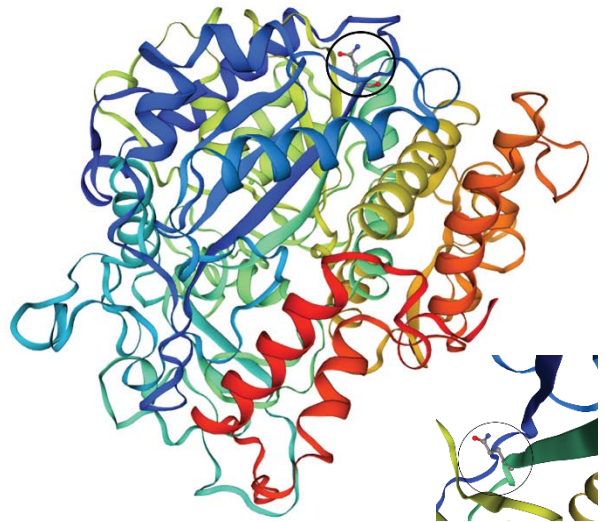

**Fig. S3-B.** The same homology model of GCLC showing location of site GCLC-a, VTFQ/A (circled). The Gln in P1 is shown. The site is at the protein surface but is recessed in a channel (inset). There is some uncertainty in the 3D structure, but an experimental structure was not available.

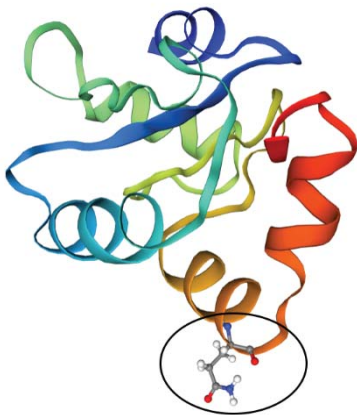

**Fig. S3-D.** NMR structure of human GLRX-1 (PDB file 1jhb). The predicted M<sup>Pro</sup> cleavage site region shown in Fig. 2D, VSLQ/Q, is circled and the Gln at P1 is displayed.

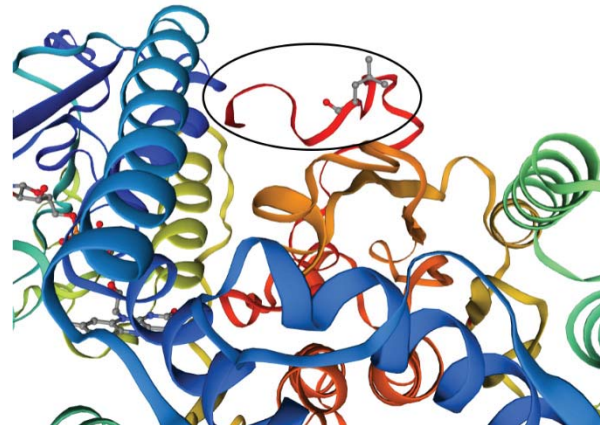

**Fig. S3-E.** X-ray structure of TXNRD1 (PDB file 2zzc). The C-terminal with the predicted M<sup>Pro</sup> cleavage site region shown in Fig. 2E, SILQ/A, is circled and the Leu at P2 is displayed. The AGCUG C-terminal redox center of TXNRD1 would be removed by M<sup>Pro</sup> cleavage at this site.

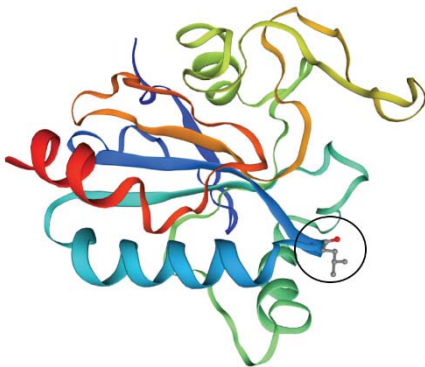

**Fig. S3-G.** X-ray structure of monomeric GPX1 (PDB file 2f8a). The predicted M<sup>Pro</sup> cleavage site region shown in Fig. 2G, ASLU/G, is circled and the Leu at P2 is displayed.

**Fig. S3-C and S3-F:** Structures were not available for SELENOF and SELENOP, but for these proteins, the predicted M<sup>Pro</sup> cleavage site was either near the N-terminal ER signal peptide cleavage site (position 27 of SELENOF) or right before a redox center active site (position 56 of SELENOP), so that a high probability of surface accessibility can be inferred in both cases.
